# Supplementary material for: The Effect of IFT80 Deficiency in Osteocytes on Orthodontic Loading-Induced and Physiologic Bone Remodeling: In Vivo Study
Source: MDPI journal article supplement (doi:10.3390/life12081147), 2022-07-29
Supplement: s1 [file s1]

# Supplementary Figure S1

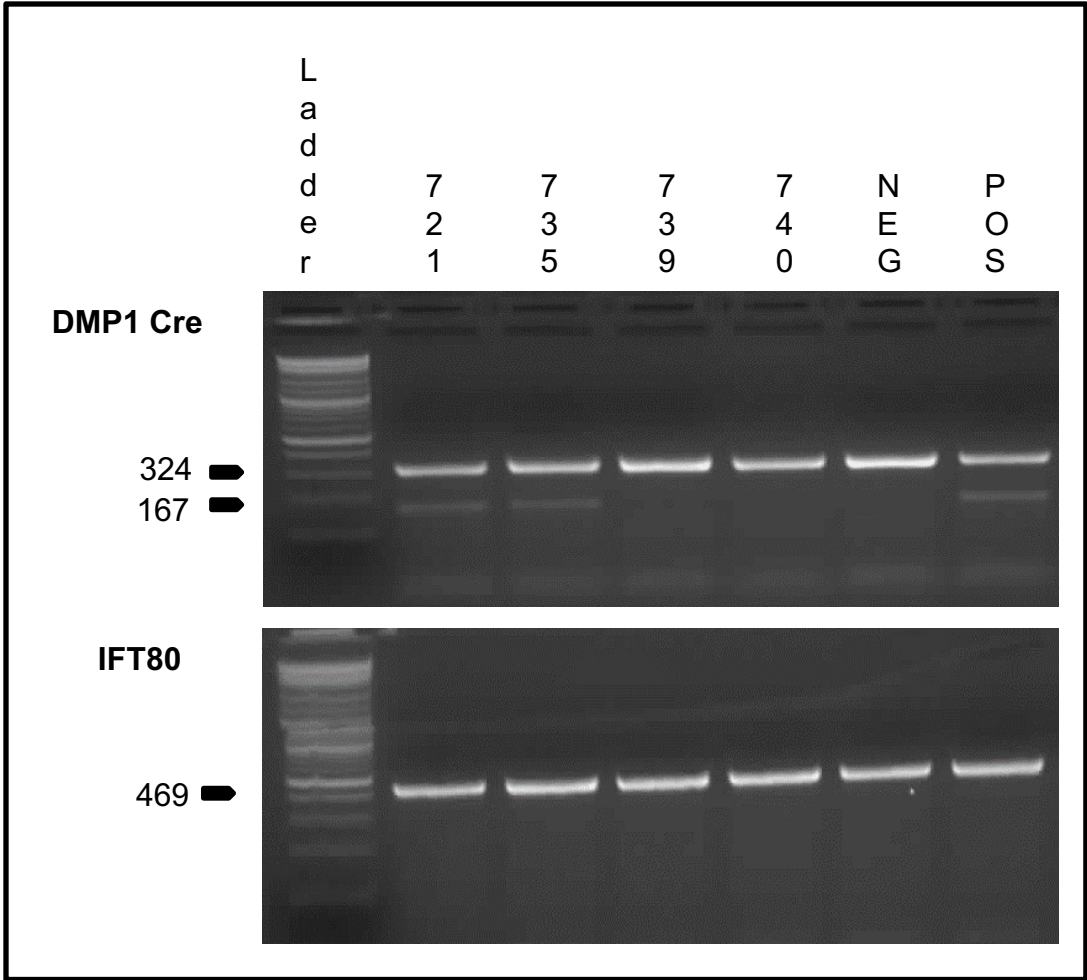

**Supplementary Figure S1.** Genotyping results for DMP1 Cre and IFT80. Genotyping was performed using the primers for DMP1-cre and IFT80 according to the manufacturer’s instructions (Jackson Laboratory). [DMP1-cre] Transgene = 167bp and Internal positive control = 324 bp. [IFT80] Transgene = 469bp and WT =247 bp.
